# Supplementary material for: Promotional effects of cetyltrimethylammonium bromide surface modification on a hematite photoanode for photoelectrochemical water splitting
Source: Royal Society of Chemistry journal article supplement (doi:10.1039/c5ra20529h), 2015-01-01
Supplement: c5ra20529h1.pdf [file c5ra20529h1.pdf]

# Promotional Effects of Cetyltrimethylammonium Bromide Surface Modification on Hematite Photoanode for Photoelectrochemical Water Splitting

*Qian Li,<sup>a,b</sup> Rajini P Antony,<sup>b</sup> Lydia Helena Wong,<sup>\*b</sup> Dickon H. L. Ng<sup>\*a</sup>*

*<sup>a</sup> Department of Physics, The Chinese University of Hong Kong, Hong Kong, China;*

*<sup>b</sup> School of Materials Science and Engineering, Nanyang Technological University,*

*Singapore, 639798.*

Prof. Dickon H. L. Ng

\*E-mail: [dng@phy.cuhk.edu.hk](mailto:dng@phy.cuhk.edu.hk). Tel.: 852 39436392, G8 Science Center North Block,

Department of Physics, The Chinese University of Hong Kong, Hong Kong, China

Prof. Lydia Helena Wong

\*E-mail: [lydiawong@ntu.edu.sg](mailto:lydiawong@ntu.edu.sg), Tel.: (+65) 6513 8292, N4.1 #02-27a, 50 Nanyang Avenue,

School of Materials Science and Engineering, Nanyang Technological University Singapore

639798

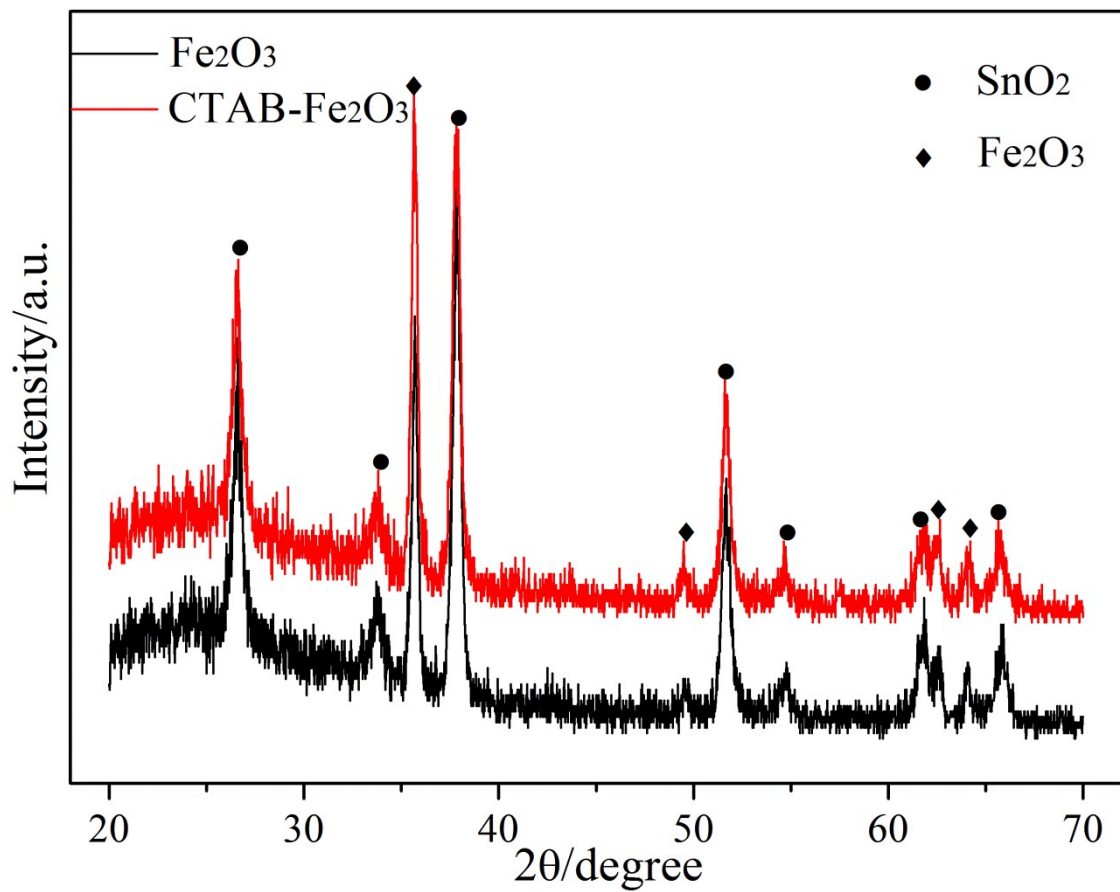

Fig. S1 XRD patterns of Fe<sub>2</sub>O<sub>3</sub> and CTAB-Fe<sub>2</sub>O<sub>3</sub>.

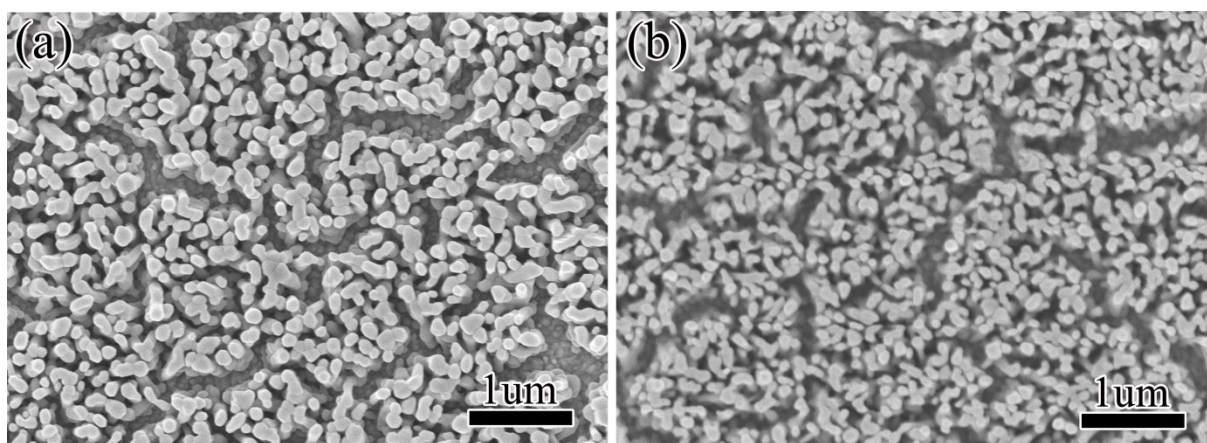

Fig. S2 SEM images of (a) Fe<sub>2</sub>O<sub>3</sub> and (b) CTAB-Fe<sub>2</sub>O<sub>3</sub>.

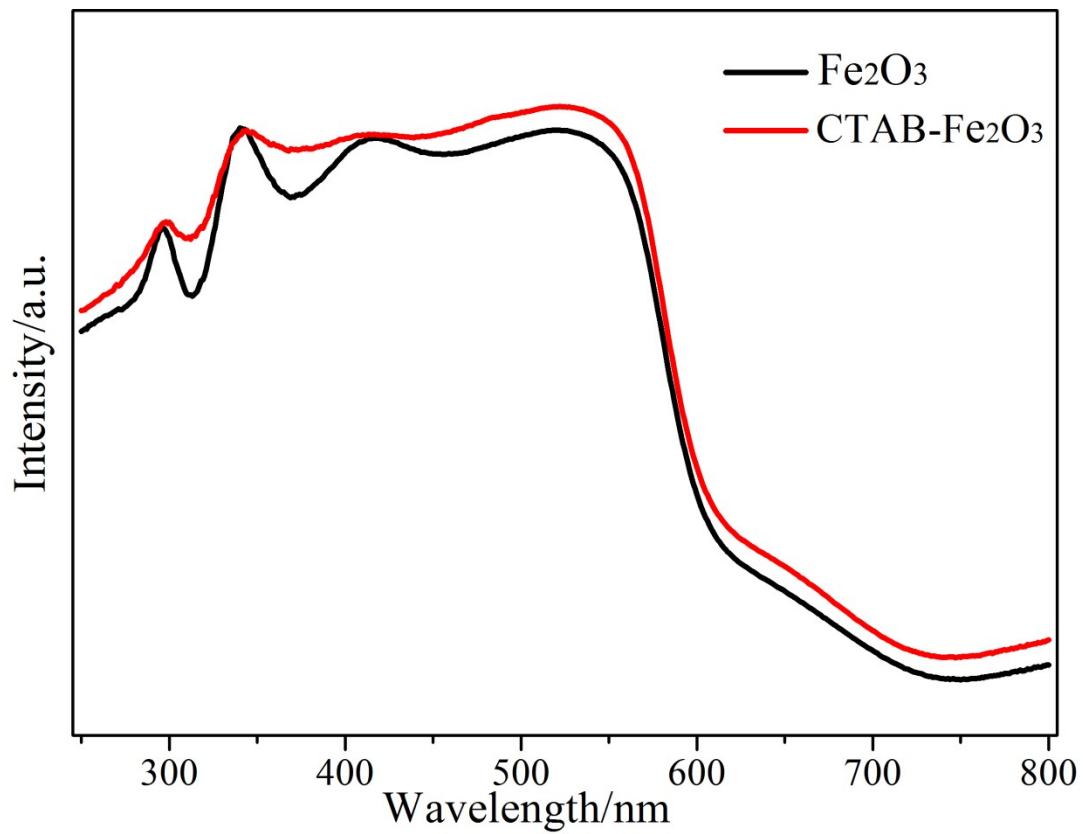

Fig. S3 UV-vis absorption spectra of Fe<sub>2</sub>O<sub>3</sub> and CTAB-Fe<sub>2</sub>O<sub>3</sub>.
